# Supplementary material
Source: publisher figshare collection journal article supplement (https://frontiersin.figshare.com/ndownloader/files/12400718)
Supplement: Supplementary file [file 12400718]

Figure S1:

Phylogenetic analysis by neighbour joining method using MEGA 6.1 software. The cladogram was constructed for amino acid sequences of HcSTP-1 to that of other known STPs, which showed that all sequences had much similar structural makeup.

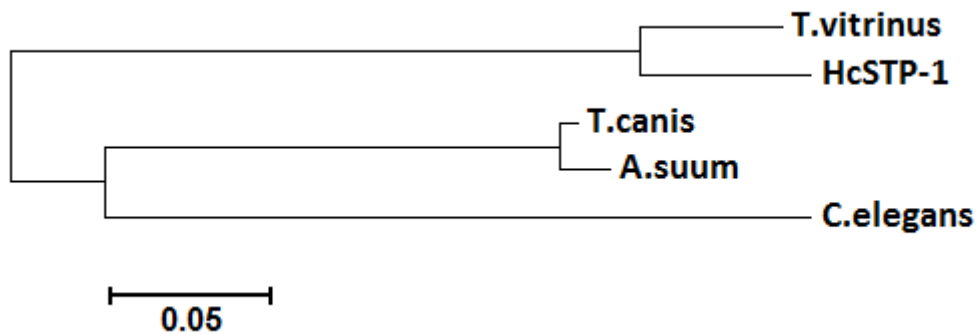

Figure S2:

The protein sequence of *H. contortus* STP-1 protein was used to predict N-terminal signal peptides by SignalP 4.1 Server (<http://www.cbs.dtu.dk/services/SignalP/>), which showed lack of any SP in its structure.

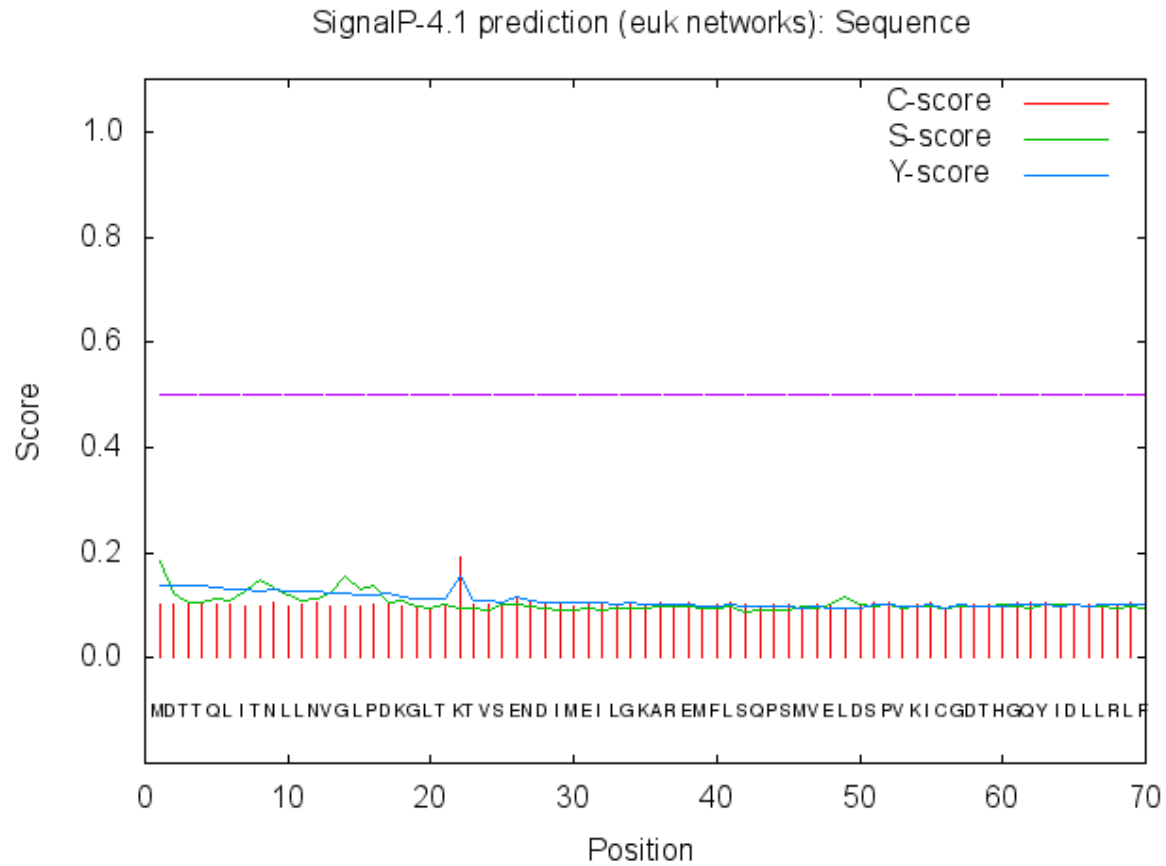

Figure S3:

Membrane protein prediction using TMHMM Server v.2.0. The amino acid sequences of HcSTP-1 was analysed to predict transmembrane structures using TMHMM Server v.2.0. There was no transmembrane domains was predicted in this protein structure. (<http://www.cbs.dtu.dk/services/TMHMM/>).

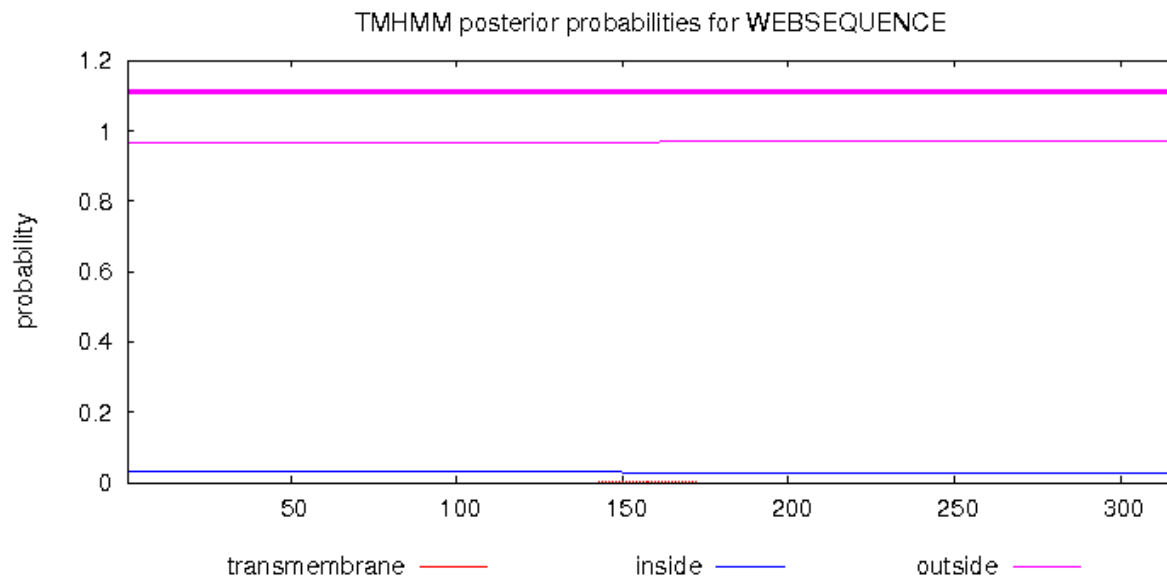

Figure S4:

Prediction of T and B cell epitopes: Protein sequence of HcSTP-1 was used for the prediction of the T cell and B cell epitopes, that revealed 13 peptides of T cell epitopes and 18 B cell epitopes in protein structure.

### T. cell Motifs:

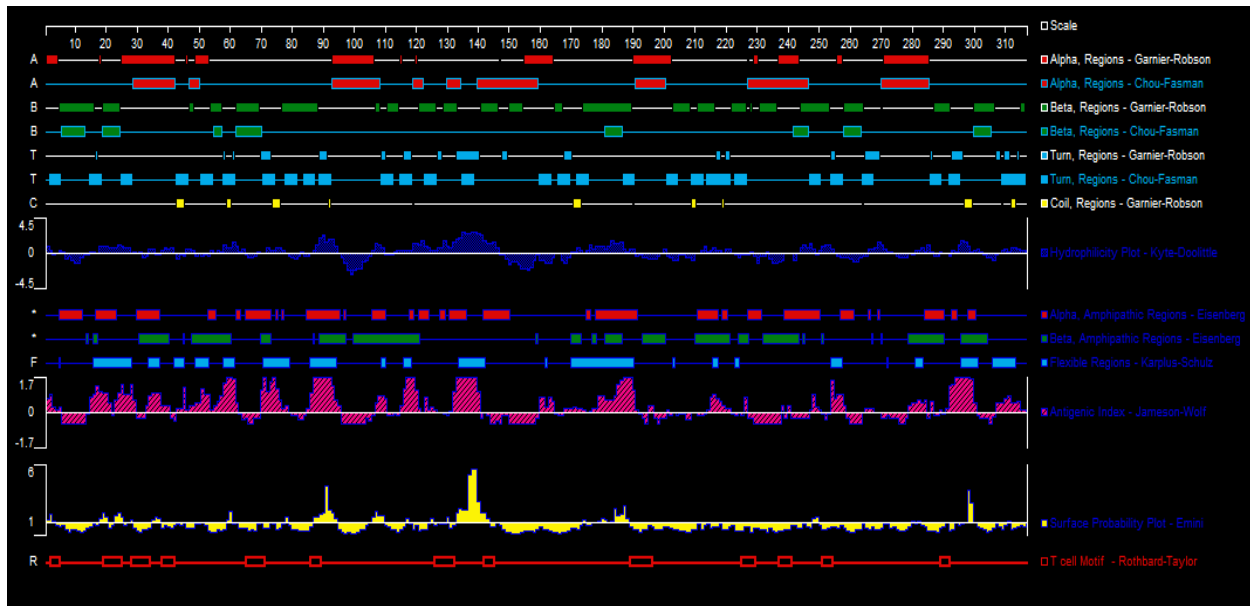

| No. | Start | End | Epitopes | Length |
|-----|-------|-----|----------|--------|
| 1   | 2     | 5   | DTTQ     | 4      |
| 2   | 19    | 25  | GLTKTVS  | 7      |
| 3   | 28    | 34  | DIMEILG  | 7      |
| 4   | 38    | 42  | EMFLS    | 5      |
| 5   | 65    | 71  | DLLRLFN  | 7      |
| 6   | 86    | 89  | DYVD     | 4      |
| 7   | 126   | 132 | RAYGFYE  | 7      |
| 8   | 142   | 145 | RMWQ     | 4      |
| 9   | 189   | 196 | DALGATLE | 8      |
| 10  | 225   | 229 | DILAK    | 5      |
| 11  | 237   | 241 | DLVAR    | 5      |
| 12  | 251   | 254 | EFFG     | 4      |
| 13  | 289   | 292 | DVFR     | 4      |

## B. Cell Epitopes:

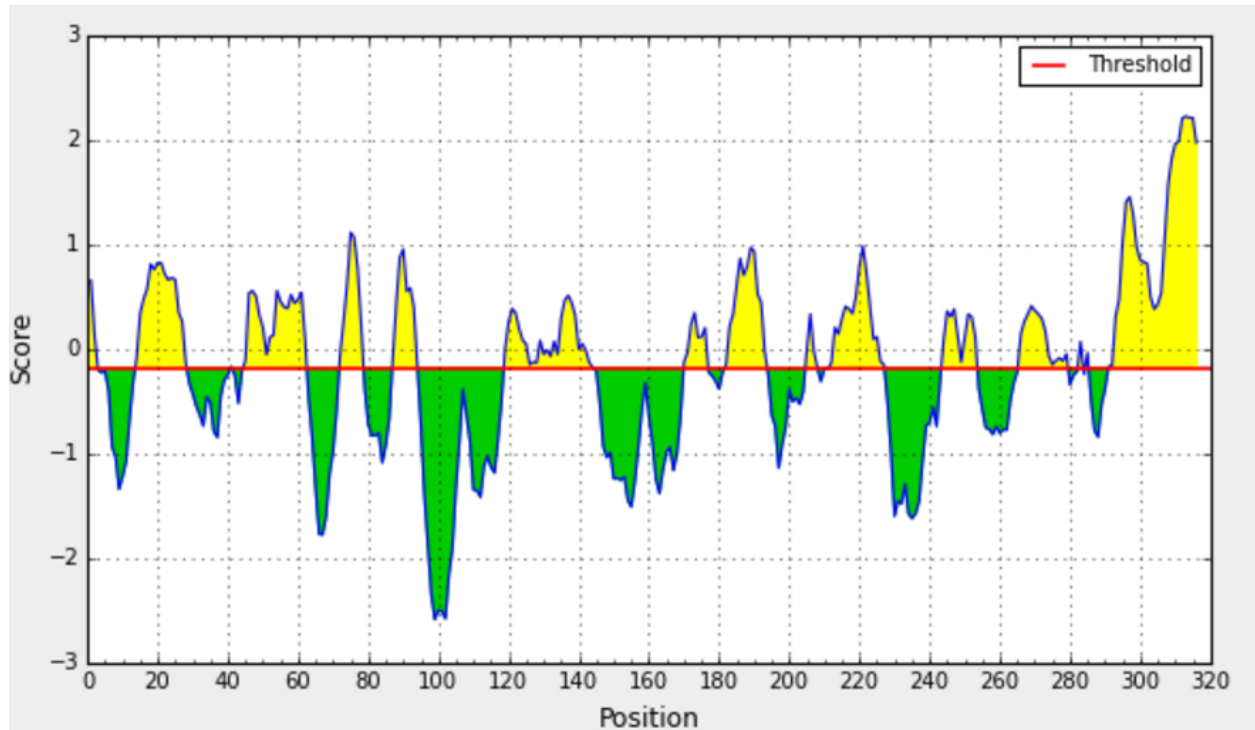

| No. | Start | End | Epitopes      | Length |
|-----|-------|-----|---------------|--------|
| 1   | 1     | 2   | MD            | 2      |
| 2   | 15    | 27  | LPDKGLTKTVSEN | 13     |
| 3   | 46    | 50  | MVELD         | 5      |
| 4   | 52    | 62  | PVKICGDTHGQ   | 11     |
| 5   | 73    | 78  | GGFPPL        | 6      |
| 6   | 88    | 93  | VDRGKQ        | 6      |
| 7   | 119   | 125 | HECANVN       | 7      |
| 8   | 129   | 129 | G             | 1      |
| 9   | 133   | 133 | E             | 1      |
| 10  | 135   | 141 | NRRYQSQ       | 7      |
| 11  | 172   | 176 | SPHLQ         | 5      |
| 12  | 183   | 192 | NITRPTDALG    | 10     |
| 13  | 206   | 206 | I             | 1      |
| 14  | 213   | 225 | ANIRGASYGFPGD | 13     |
| 15  | 244   | 248 | QVVQD         | 5      |
| 16  | 250   | 253 | YEFF          | 4      |
| 17  | 266   | 273 | HYCGQFDN      | 8      |
| 18  | 283   | 283 | N             | 1      |
